# Supplementary material for: Effects of Overexpression of Neurosecretory Protein GL-Precursor Gene on Glucose Homeostasis and Insulin Sensitivity in Mice
Source: MDPI journal article supplement (doi:10.3390/ijms22094681), 2021-04-28
Supplement: s1 [file s1]

## Effects of Overexpression of Neurosecretory Protein GL-Precursor Gene on Glucose Homeostasis and Insulin Sensitivity in Mice

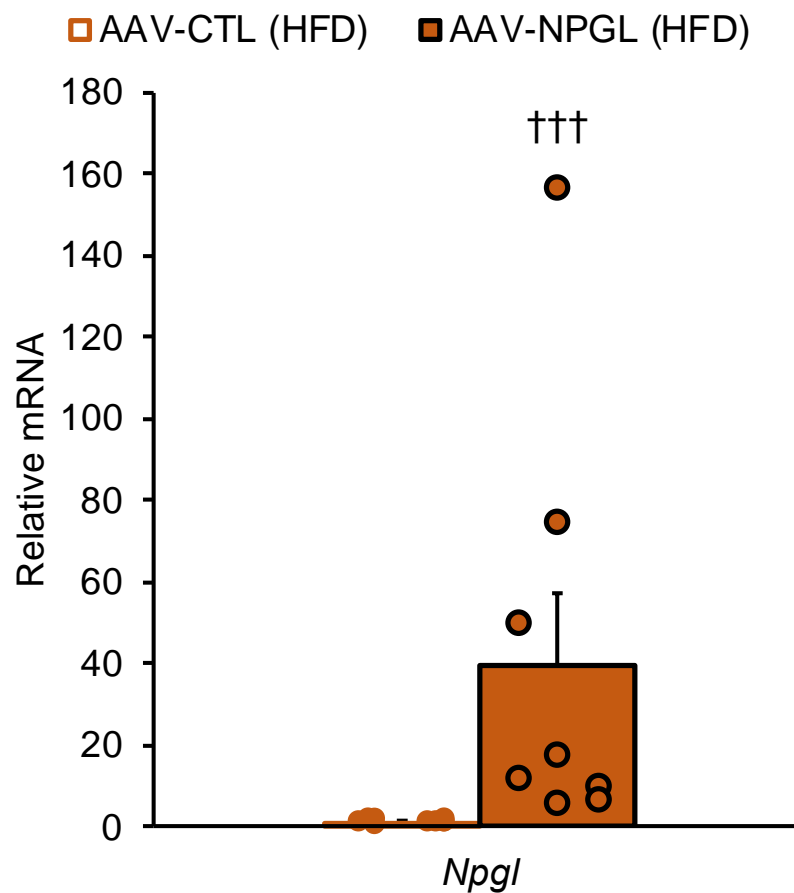

**Figure S1.** Efficacy of *Npgl* overexpression in the mediobasal hypothalamus at the experimental endpoint. The panel shows mRNA expression level of *Npgl* obtained upon injection the AAV-based control vector (AAV-CTL) or the AAV-based NPGL-precursor gene vector (AAV-NPGL) in high-fat diet (HFD)-fed mice. Circles represent individual data points. Each value represents the mean  $\pm$  standard error of the mean ( $n = 8$ ; ††† $p < 0.005$  for Mann-Whitney  $U$  test).

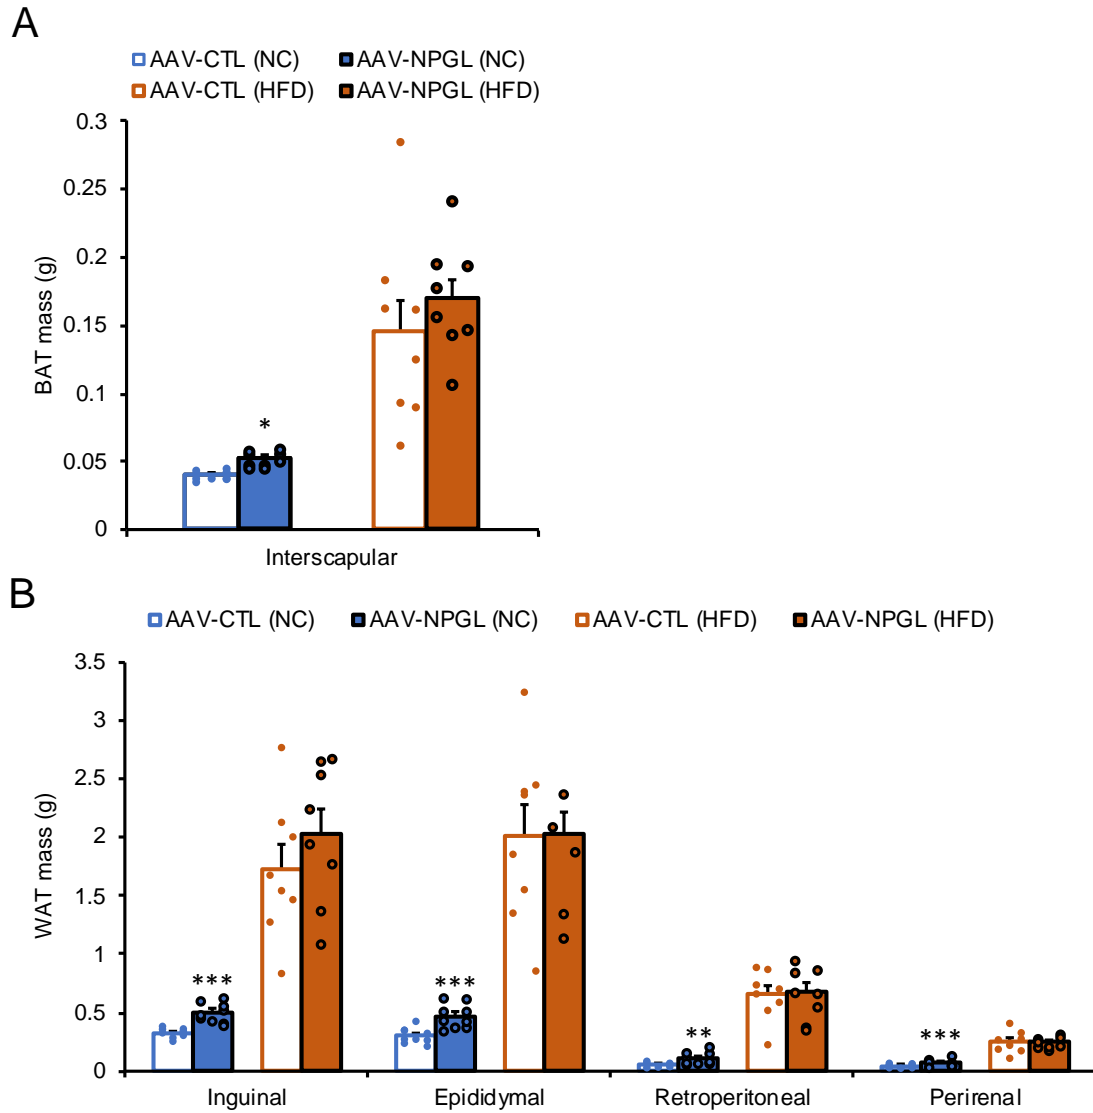

**Figure S2.** Effects of *Npgl* overexpression on fat accumulation in normal chow (NC)-fed and high-fat diet (HFD)-fed mice. The panels show the data obtained upon injection of the AAV-based control vector (AAV-CTL) or the AAV-based NPGL-precursor gene vector (AAV-NPGL) in NC-fed and HFD-fed mice. **(A)** Brown adipose tissue (BAT) mass. **(B)** Masses of inguinal, epididymal, retroperitoneal, and perirenal white adipose tissue (WAT). Circles represent individual data points. Each value represents the mean  $\pm$  standard error of the mean (NC-fed mice:  $n = 9$ ;  $*p < 0.05$ ,  $**p < 0.01$ ,  $***p < 0.005$  for Student's *t*-test, HFD-fed mice:  $n = 8$ ).

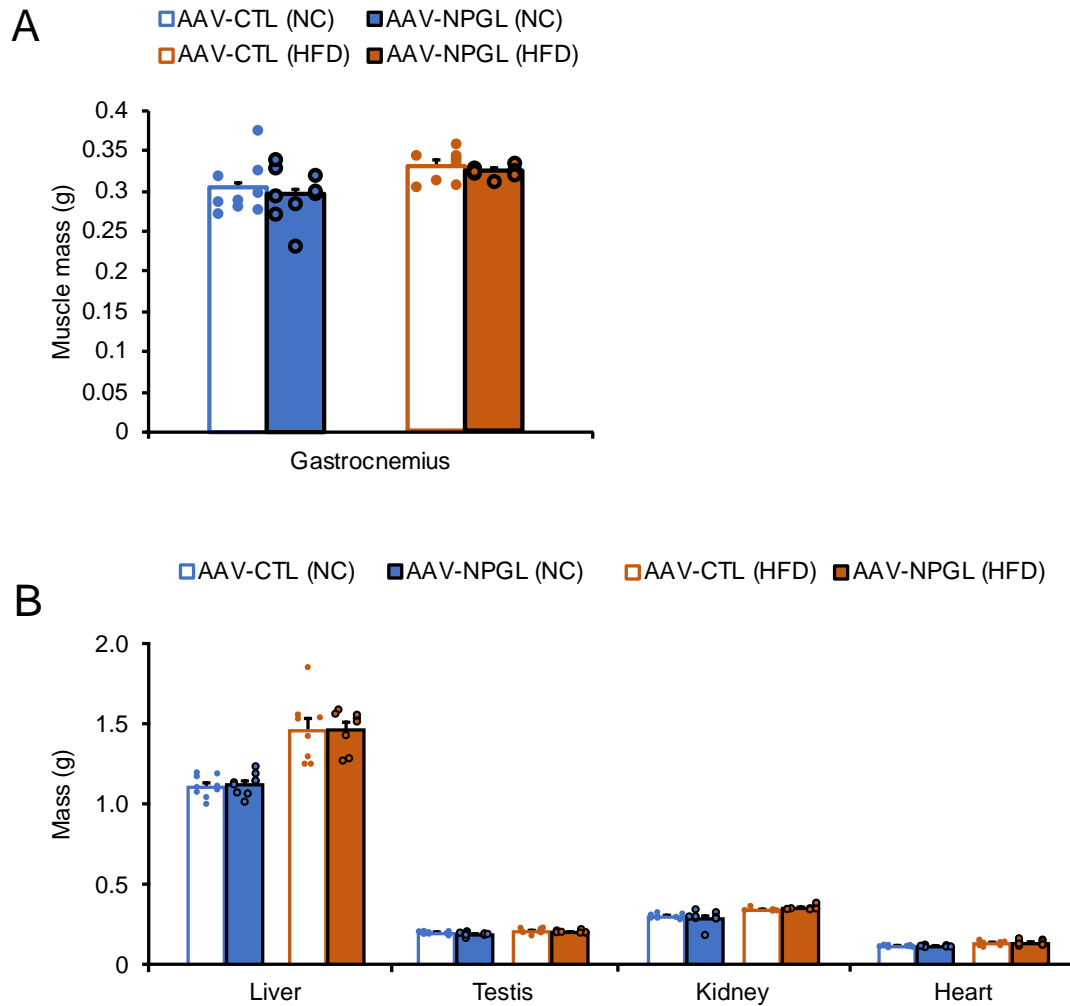

**Figure S3.** Effects of *Npgl* overexpression on muscle and organ masses in normal chow (NC)-fed and high-fat diet (HFD)-fed mice. The panels show the data obtained upon injection of the AAV-based control vector (AAV-CTL) or the AAV-based NPGL-precursor gene vector (AAV-NPGL) in NC-fed and HFD-fed mice. (A) Gastrocnemius muscle mass. (B) Masses of the liver, testis, kidney, and heart. Circles represent individual data points. Each value represents the mean  $\pm$  standard error of the mean (NC-fed mice:  $n = 9$ , HFD-fed mice:  $n = 8$ ).

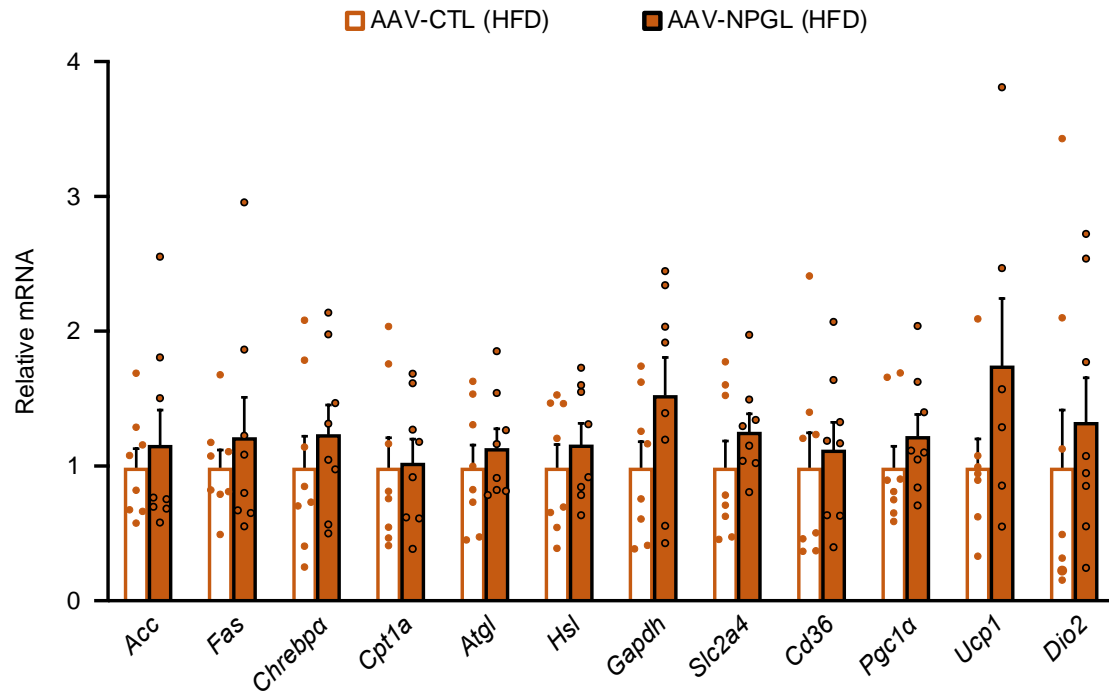

**Figure S4.** Effects of *Npgl* overexpression on mRNA expression of genes related to lipid metabolism, glycolysis, glucose and lipid uptake, and browning in the inguinal white adipose tissue of high-fat diet (HFD)-fed mice. The graph shows the data obtained upon injection of the AAV-based control vector (AAV-CTL) or the AAV-based NPGL-precursor gene vector (AAV-NPGL) in HFD-fed mice. mRNA expression levels of acetyl-CoA carboxylase (*Acc*), fatty acid synthase (*Fas*), carbohydrate-responsive element-binding protein  $\alpha$  (*Chrebp* $\alpha$ ), carnitine palmitoyltransferase 1a (*Cpt1a*), adipose triglyceride lipase (*Atgl*), hormone-sensitive lipase (*Hsl*), glyceraldehyde-3-phosphate dehydrogenase (*Gapdh*), solute carrier family 2 member 4 (*Slc2a4*), cluster of differentiation 36 (*Cd36*), peroxisome proliferator-activated receptor  $\gamma$  coactivator 1 $\alpha$  (*Pgc1* $\alpha$ ), uncoupling protein 1 (*Ucp1*), and type II iodothyronine deiodinase (*Dio2*). Circles represent individual data points. Each value represents the mean  $\pm$  standard error of the mean ( $n = 6-8$ ).

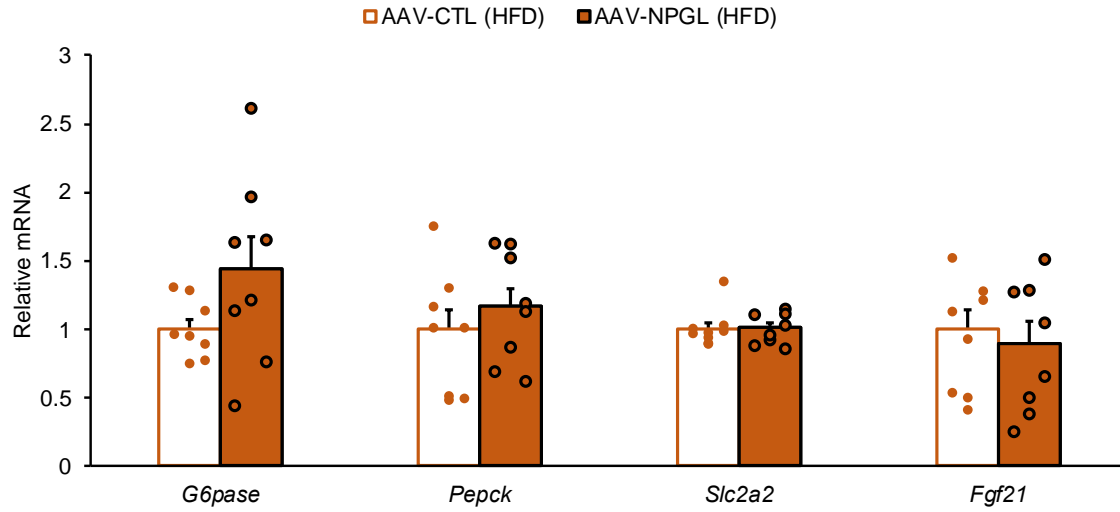

**Figure S5.** Effects of *Npgl* overexpression on mRNA expression of genes related to gluconeogenesis and glucose uptake in the liver of high-fat diet (HFD)-fed mice. The graph shows the data obtained upon injection of the AAV-based control vector (AAV-CTL) or the AAV-based NPGL-precursor gene vector (AAV-NPGL) in HFD-fed mice. mRNA expression levels of glucose-6-phosphatase (*G6pase*), phosphoenolpyruvate carboxykinase (*Pepck*), solute carrier family 2 member 2 (*Slc2a2*), and fibroblast growth factor 21 (*Fgf21*). Circles represent individual data points. Each value represents the mean  $\pm$  standard error of the mean ( $n = 8$ ).
